# Supplementary material for: Pathway level analysis of gene expression using singular value decomposition
Source: Springer Nature journal article supplement (doi:10.1186/1471-2105-6-225), 2005-09-12
Supplement: 12859_2005_550_MOESM1_ESM.pdf [file 12859_2005_550_MOESM1_ESM.pdf]

Select predefined sets of genes (e.g., pathways)

```
graph TD; A[Select predefined sets of genes (e.g., pathways)] --> B[Calculate pathway "activity" levels (Fig. 2)]; B --> C[Identify differentially expressed pathways];
```

Calculate pathway "activity" levels (Fig. 2)

Identify differentially expressed pathways
