# Supplementary material for: Pathway level analysis of gene expression using singular value decomposition
Source: Springer Nature journal article supplement (doi:10.1186/1471-2105-6-225), 2005-09-12

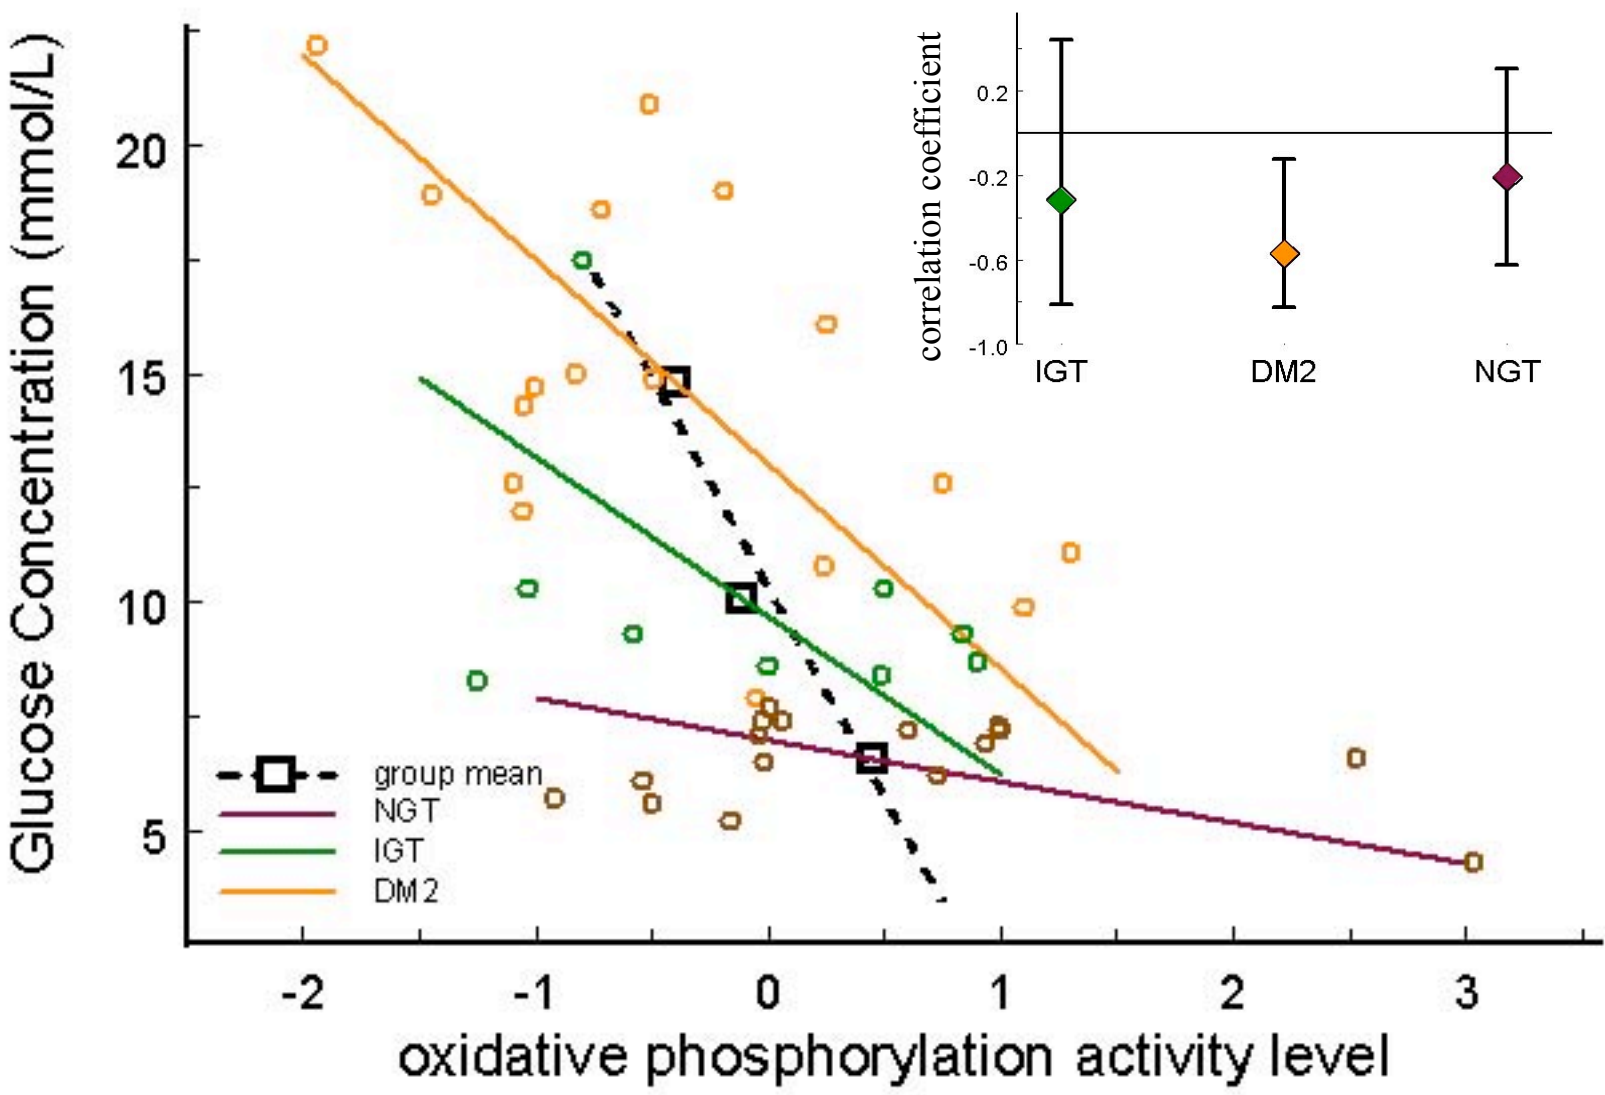

Supplement: 12859_2005_550_MOESM3_ESM.pdf [file 12859_2005_550_MOESM3_ESM.pdf]
