# Supplementary material for: Pathway level analysis of gene expression using singular value decomposition
Source: Springer Nature journal article supplement (doi:10.1186/1471-2105-6-225), 2005-09-12
Supplement: 12859_2005_550_MOESM4_ESM.pdf [file 12859_2005_550_MOESM4_ESM.pdf]

Current

Former

Never

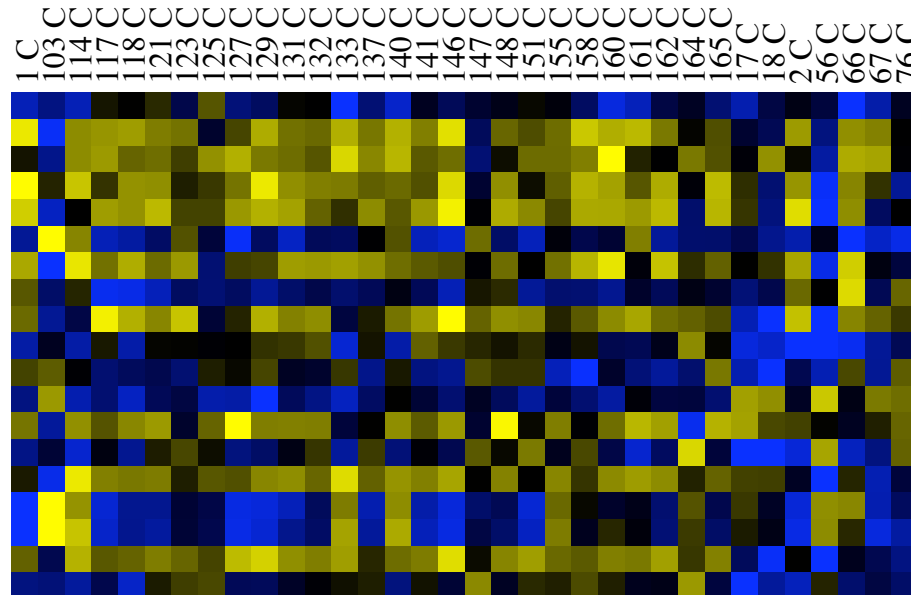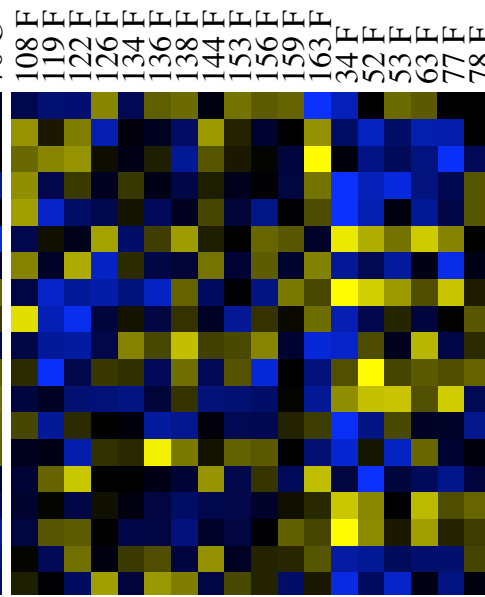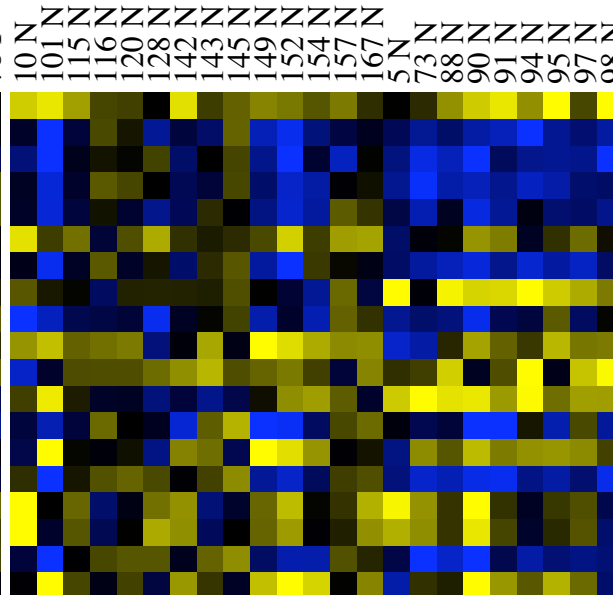

Pathways

- gamma-Hexachlorocyclohexane degradation
- Prostaglandin and leukotriene metabolism
- O-Glycans biosynthesis
- Pentose and glucuronate interconversions
- Glutathione metabolism
- Lectin Induced Complement Pathway
- Chaperones modulate interferon Signaling Pathway
- TACI and BCMA stimulation of B cell immune responses.
- Tetrachloroethene degradation
- FXR and LXR Regulation of Cholesterol Metabolism
- TSP-1 Induced Apoptosis in Microvascular Endothelial Cell
- Galactose metabolism
- Biosynthesis of steroids
- Map Kinase Inactivation of SMRT Corepressor
- Nicotinate and nicotinamide metabolism
- Classical Complement Pathway
- Complement Pathway
- Nucleotide sugars metabolism
- Degradation of the RAR and RXR by the proteasome

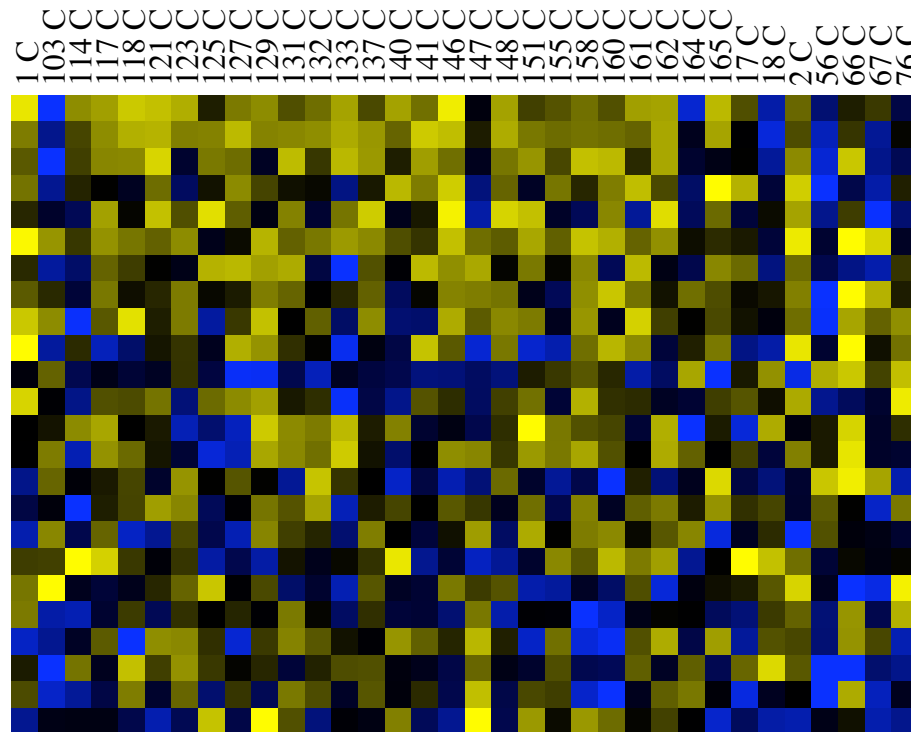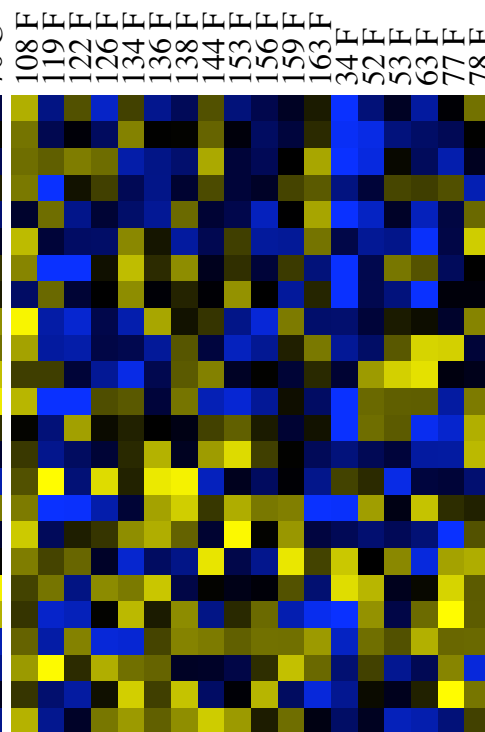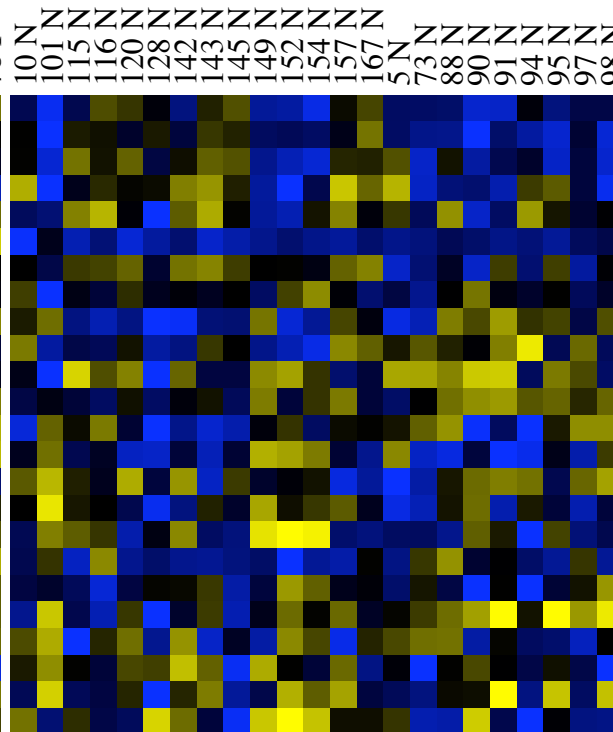

Genes involved in glutathione metabolism

- (w = 0.39) GCLM
- (w = 0.38) GCLC
- (w = 0.35) IDH1
- (w = 0.30) MGST3
- (w = 0.29) GSTA4
- (w = 0.28) GPX2
- (w = 0.24) GSTA3
- (w = 0.23) GSTM3
- (w = 0.21) GSTP1
- (w = 0.20) GPX3
- (w = -0.17) ANPEP
- (w = 0.17) GSTA2
- (w = 0.14) MGST2
- (w = 0.13) GPX1
- (w = -0.12) GSTM4
- (w = 0.10) GPX4
- (w = -0.08) GSS
- (w = 0.08) IDH2
- (w = -0.06) GGT1
- (w = -0.04) GSTM2
- (w = 0.03) GSTT1
- (w = 0.03) GSTA1
- (w = 0.01) GSTM1
- (w = -0.00) GSTO1

low (arbitrary units)

high
